# Supplementary material
Source: PubMed Central journal article supplement (PMC6862768)
Supplement: NIHMS1057270-supplement-Original_uncropped_images_of_gels_or_blots.pdf [file NIHMS1057270-supplement-Original_uncropped_images_of_gels_or_blots.pdf]

# Figure 2e

## TBK1

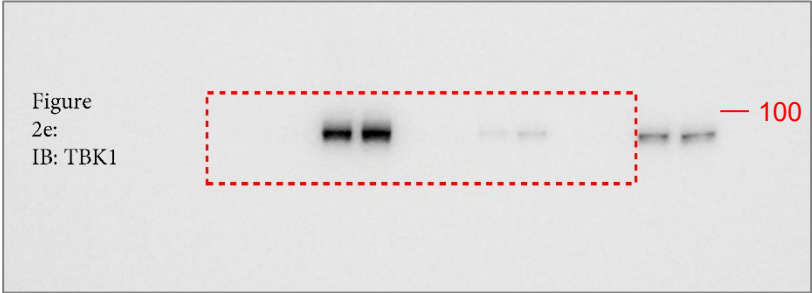

Chemiluminescence

## TBK1 with MW marker

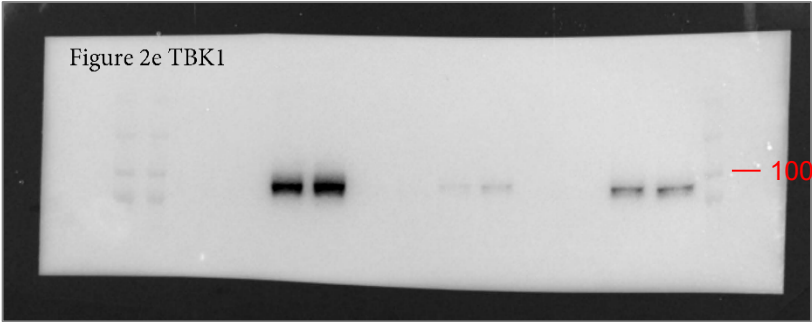

Merge: Chemiluminescence+Colorimetric

## STING with MW marker

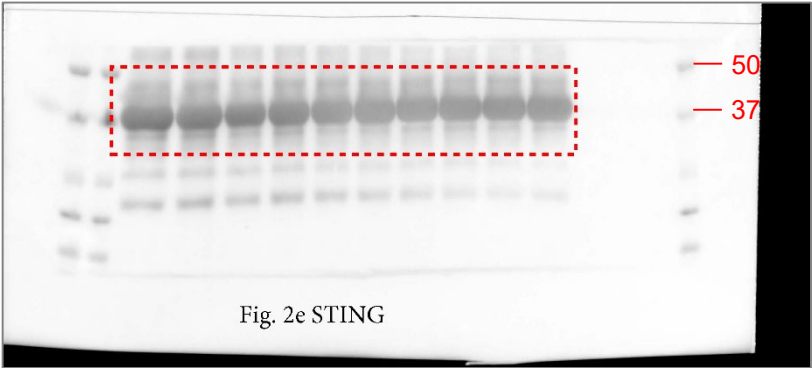

Colorimetric

Figure 2h

p-TBK1

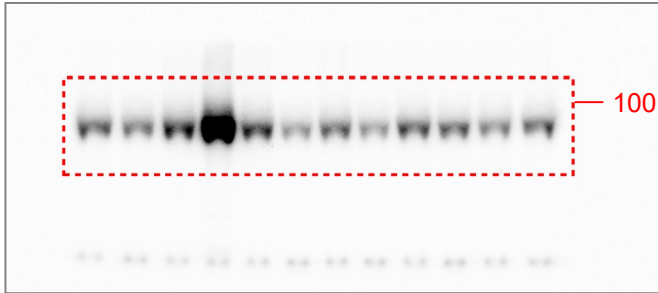

p-TBK1 with MW marker

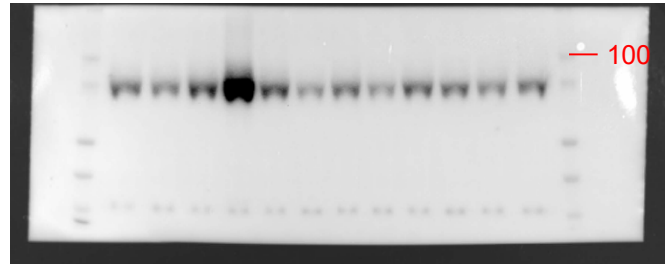

p-IRF3

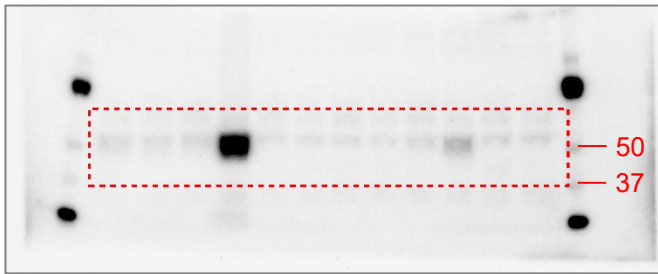

p-IRF3 with MW marker

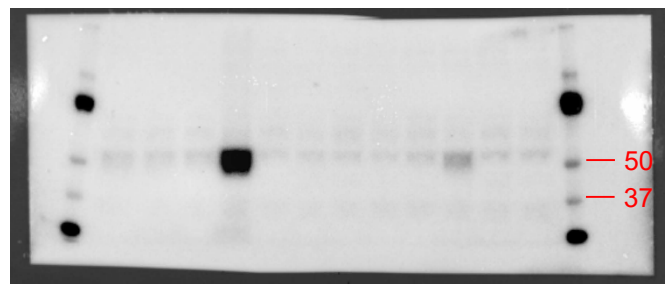

p-STING

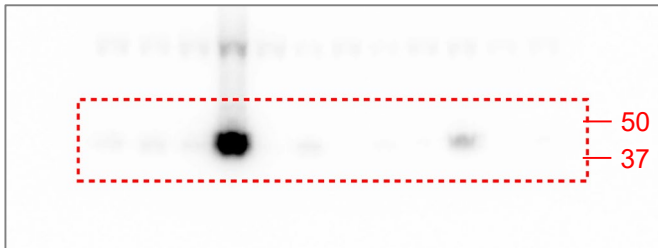

p-STING with MW marker

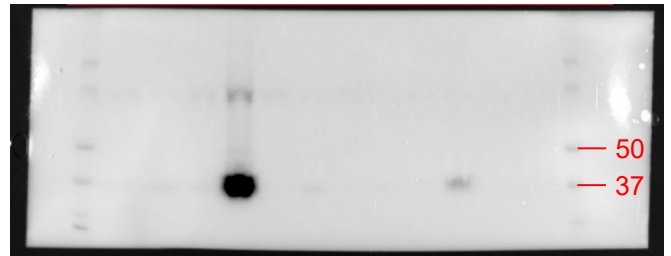

Chemiluminescence

Merge: Chemiluminescence+Colorimetric

Tubulin\_loading control run  
on the same gel of p-STING

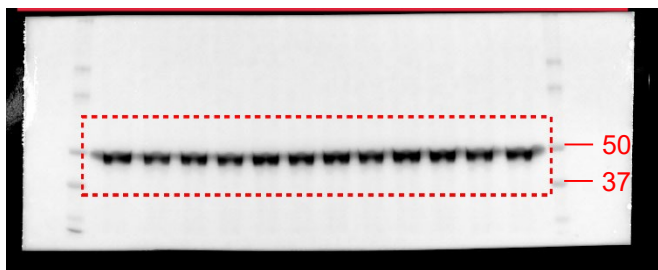

STING with MW marker

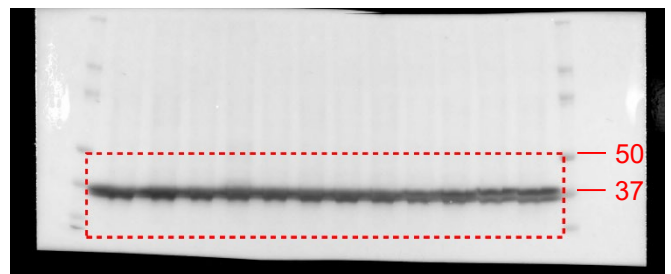

Colorimetric

Colorimetric

Figure 2i

p-TBK1

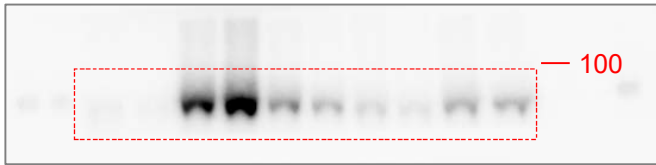

p-TBK1 with MW marker

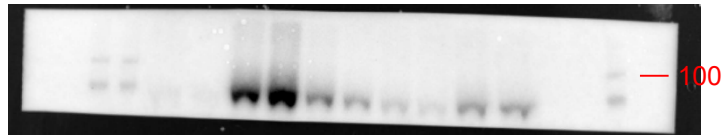

p-IRF3

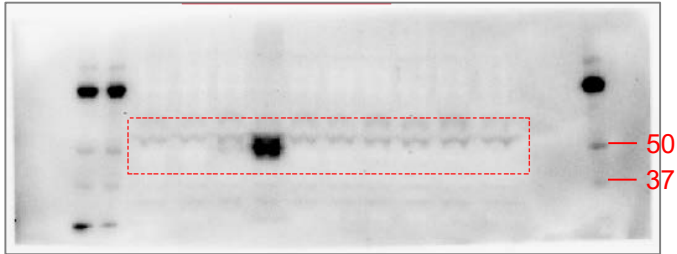

p-IRF3 with MW marker

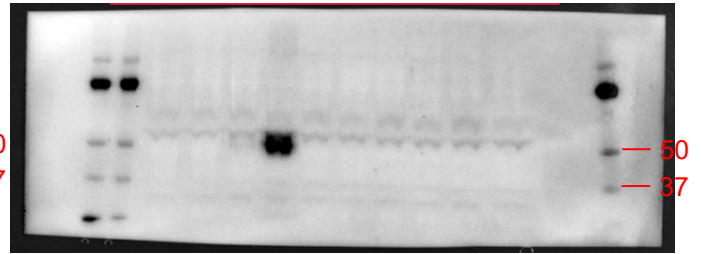

p-STING

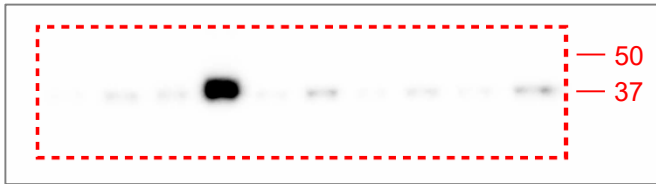

p-STING with MW marker

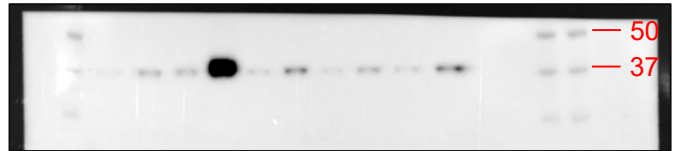

TBK1

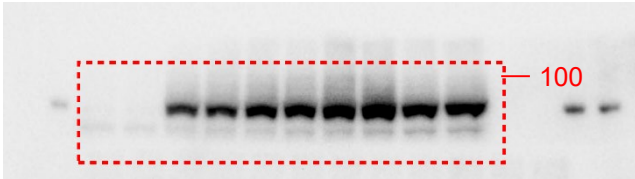

TBK1 with MW marker

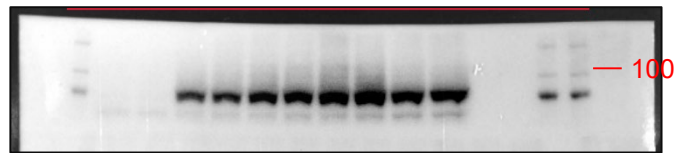

Chemiluminescence

Merge: Chemiluminescence+Colorimetric

Tubulin\_loading control run  
on the same gel of p-STING

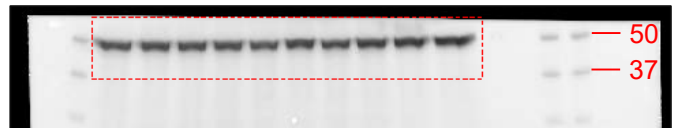

STING with MW marker

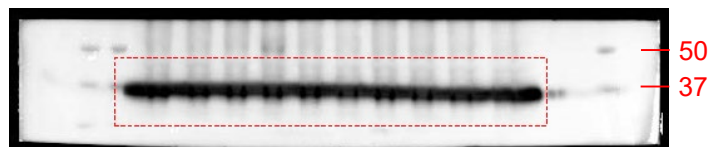

Colorimetric

Figure 3a

p-TBK1

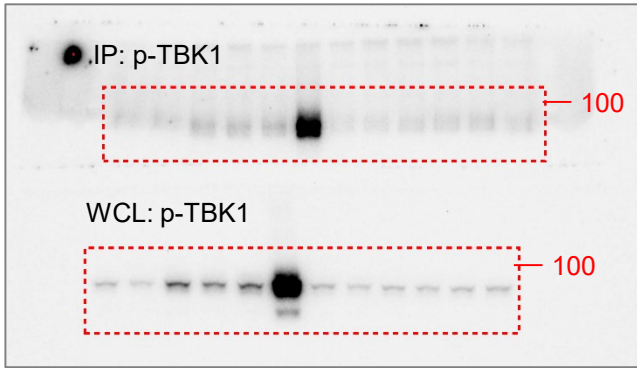

p-TBK1 with MW marker

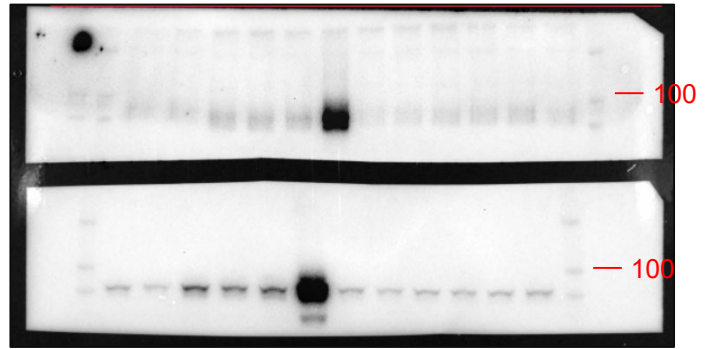

IP: TBK1

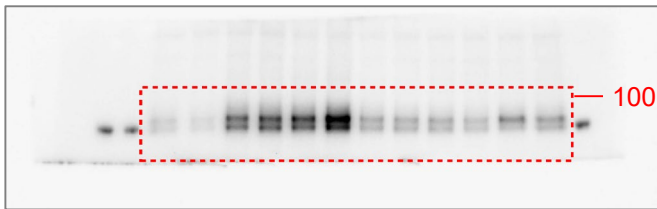

IP: TBK1 with MW marker

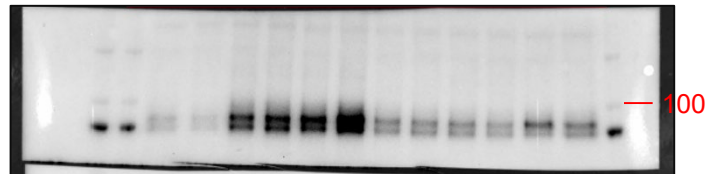

WCL: TBK1

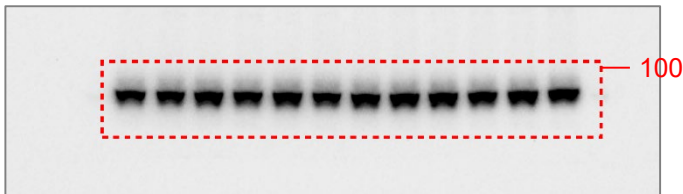

WCL: TBK1 with MW marker

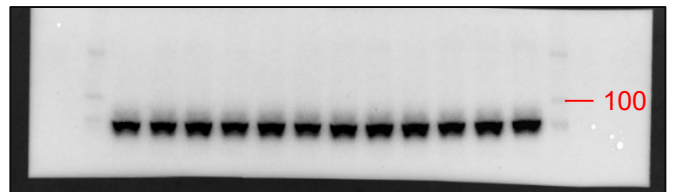

IP: p-STING

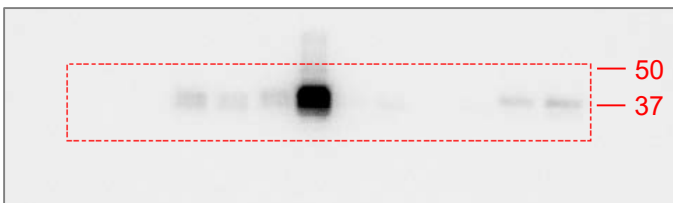

IP: p-STING with MW marker

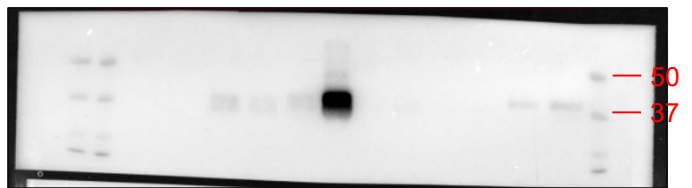

WCL: p-STING

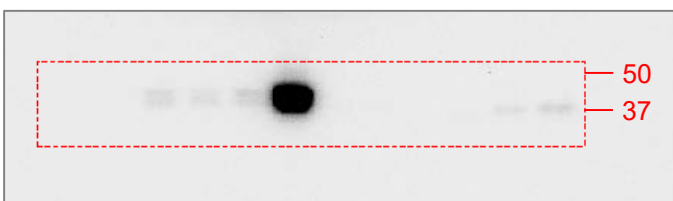

WCL: p-STING with MW marker

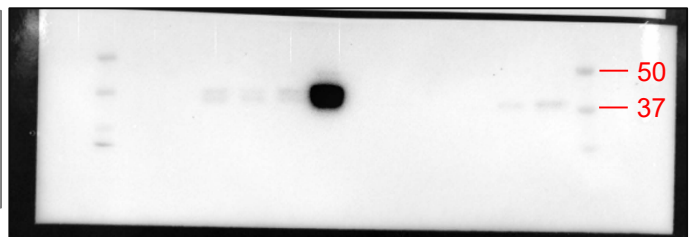

Chemiluminescence

Merge: Chemiluminescence+Colorimetric

Figure 3a

STING with MW marker

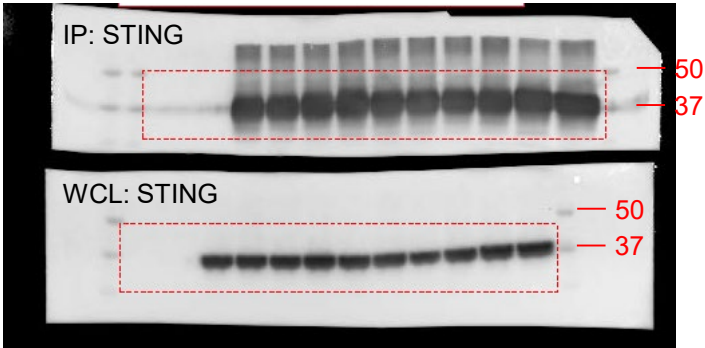

Tubulin\_loading control run  
on the same gel of p-STING

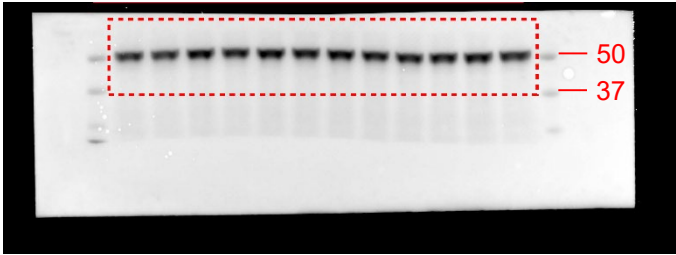

Colorimetric

Figure 3b

IP: p-TBK1

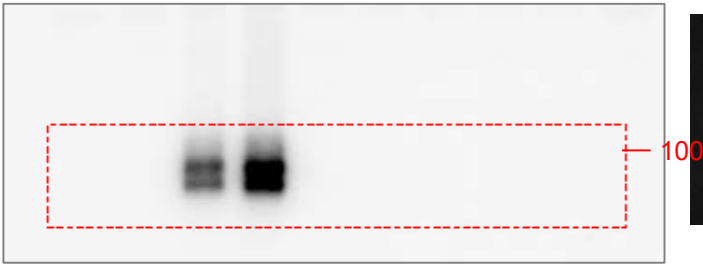

IP: p-TBK1 with MW marker

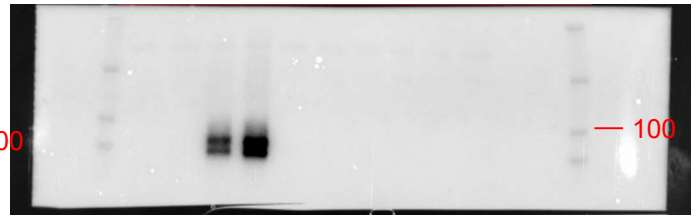

IP: TBK1

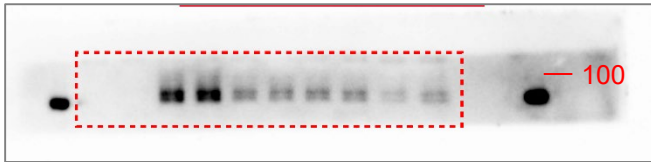

IP: TBK1 with MW marker

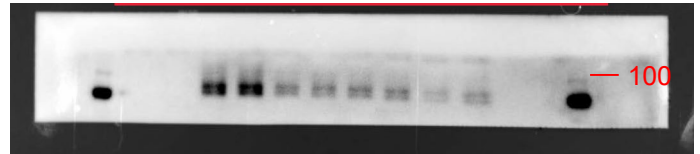

IP: p-STING

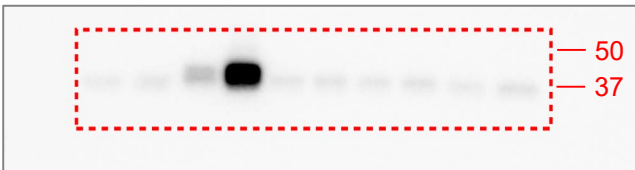

IP: p-STING with MW marker

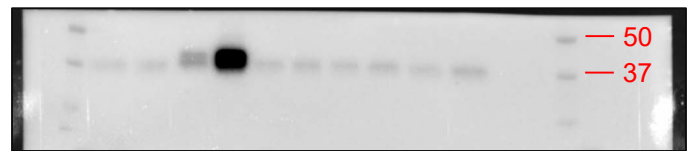

WCL: p-TBK1

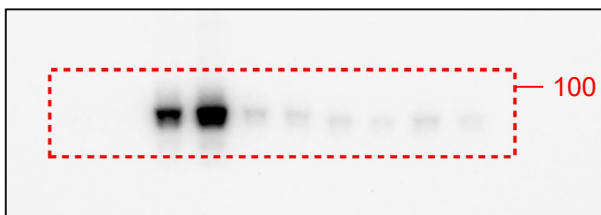

WCL: p-TBK1 with MW marker

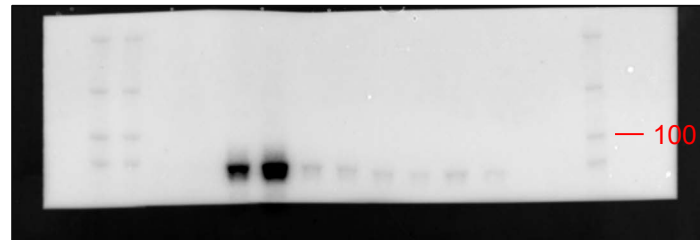

Chemiluminescence

Merge: Chemiluminescence+Colorimetric

IP: STING with MW marker

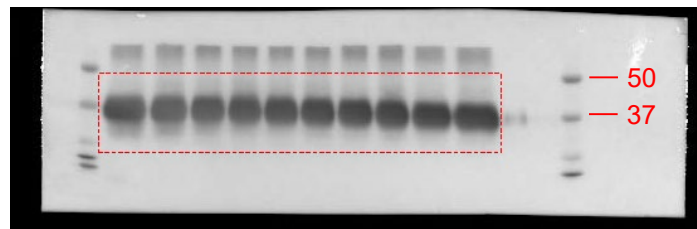

Colorimetric

Figure 3b

WCL: TBK1

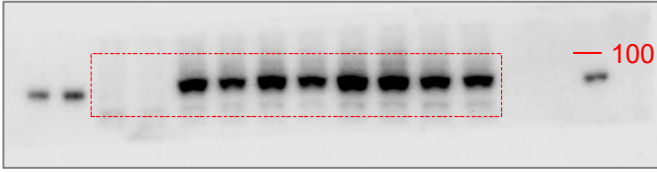

WCL: TBK1 with MW marker

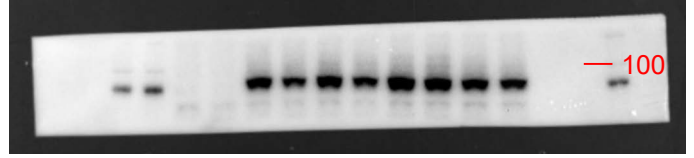

WCL: p-STING

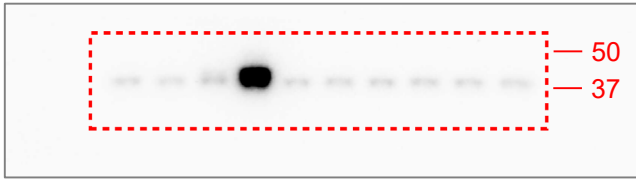

Chemiluminescence

WCL: p-STING with MW marker

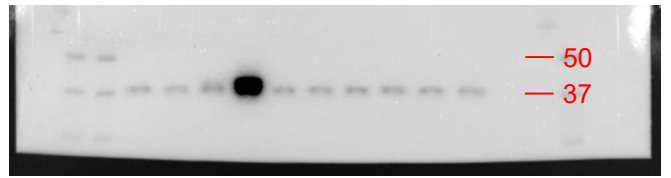

Merge: Chemiluminescence+Colorimetric

WCL: STING with MW marker

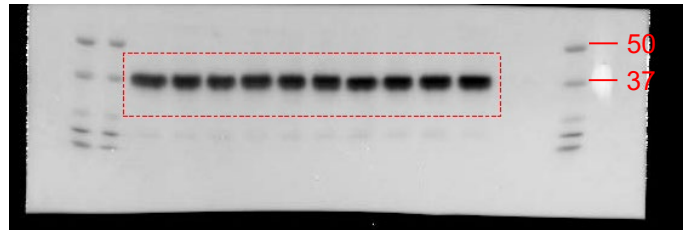

Tubulin\_loading control run  
on the same gel of p-STING

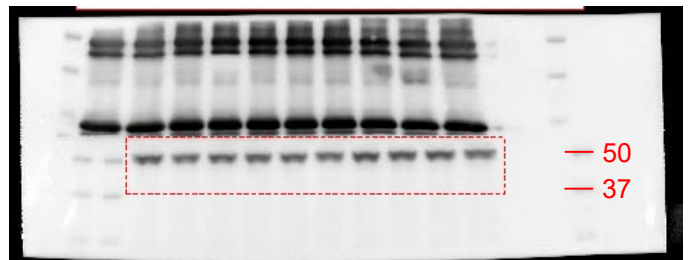

Colorimetric



# Figure 4c-f

Figure 4c: p-TBK1

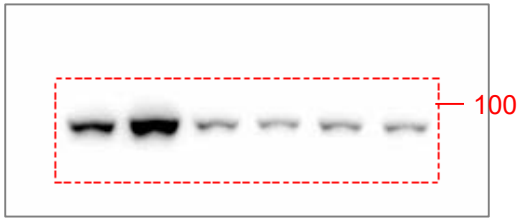

Figure 4c: p-TBK1 with MW marker

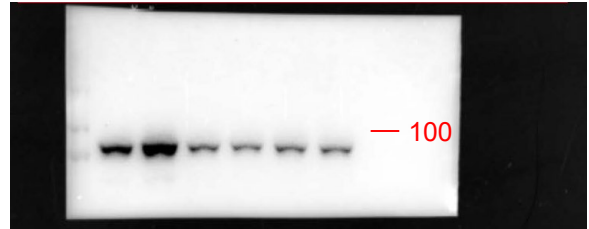

Figure 4c: p-STING

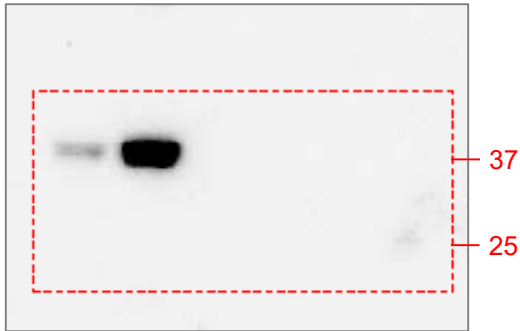

Figure 4c: STING with MW marker

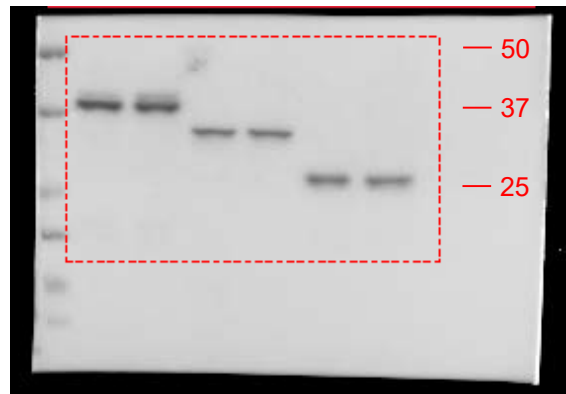

Colorimetric

Figure 4d: p-TBK1

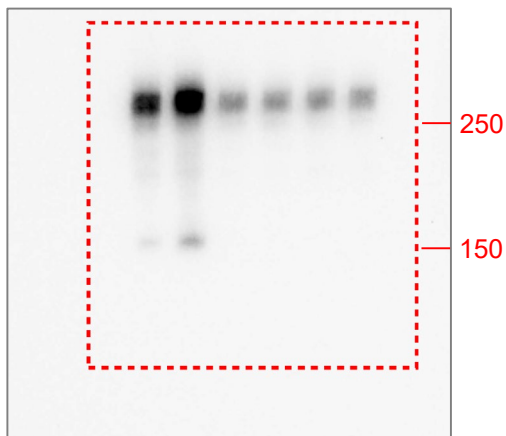

Chemiluminescence

Figure 4d: p-TBK1 with MW marker

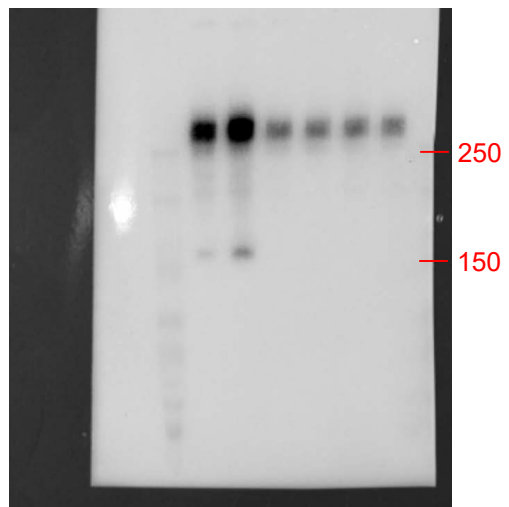

Merge: Chemiluminescence+Colorimetric



Figure 4c-f

Figure 4e: p-STING

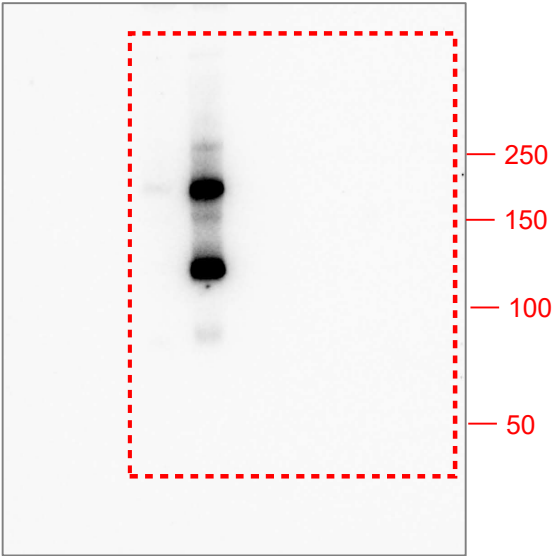

Figure 4f: STING

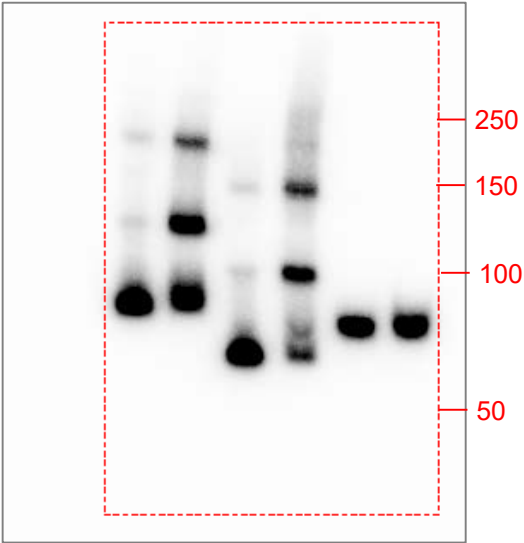

Chemiluminescence

Figure 4f: STING with MW marker

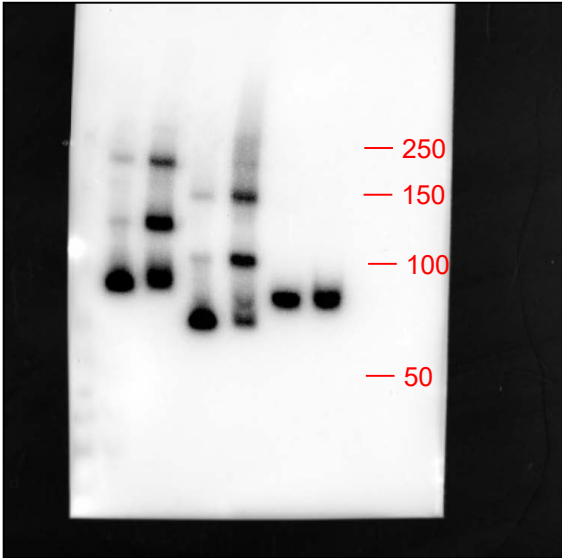

Merge: Chemiluminescence+Colorimetric

# Figure 4h

p-TBK1

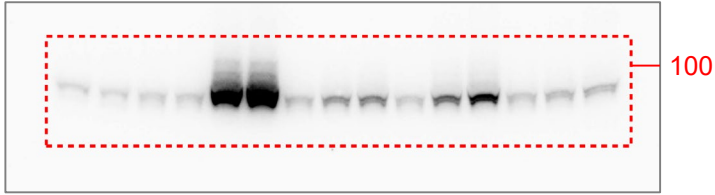

p-STING

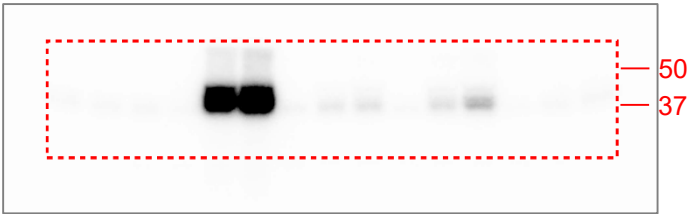

p-IRF3

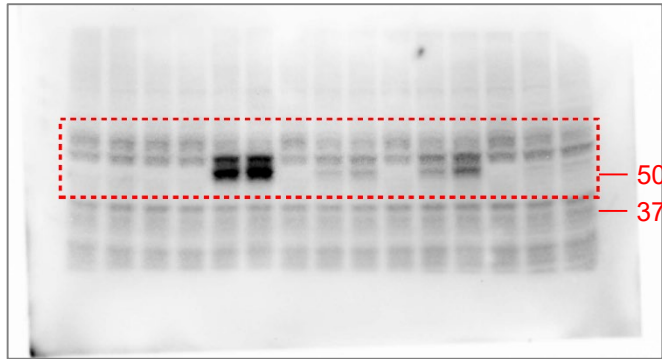

Chemiluminescence

p-STING with MW marker

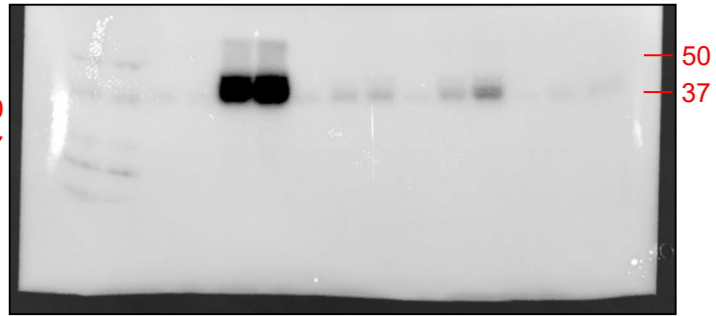

Merge: Chemiluminescence+Colorimetric

STING

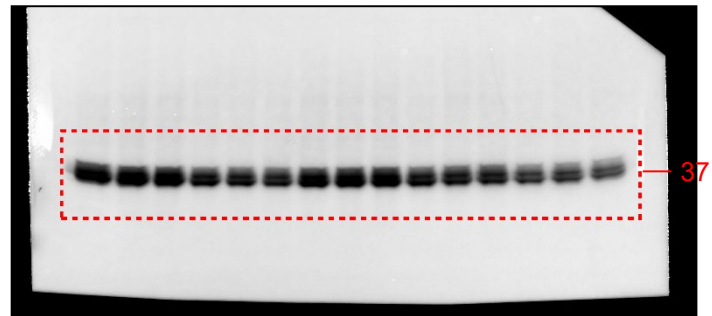

Tubulin\_loading control run  
on separated gel

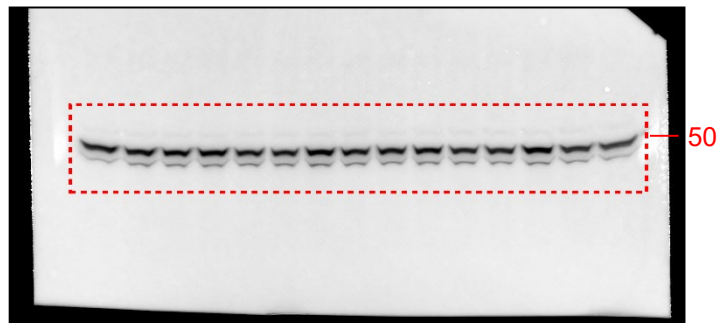

Colorimetric

Figure 4i

STING\_Native

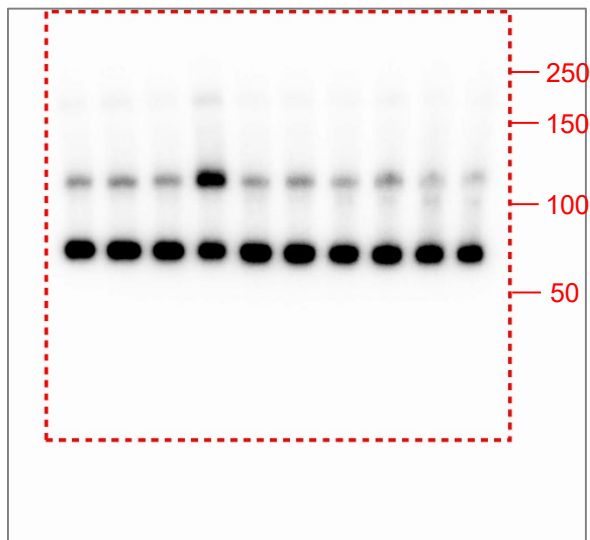

STING\_Native with MW marker

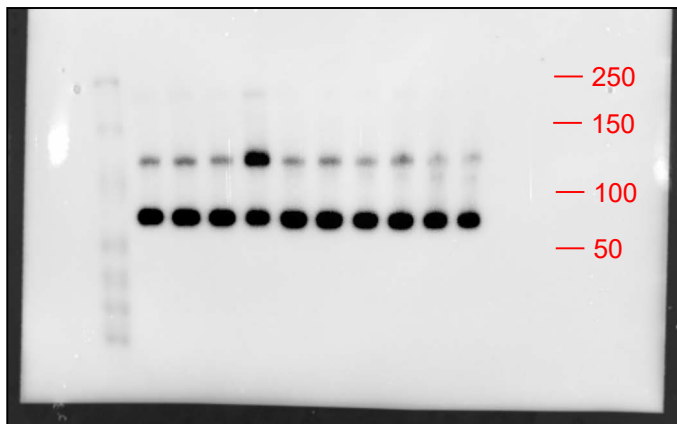

STING\_SDS-PAGE

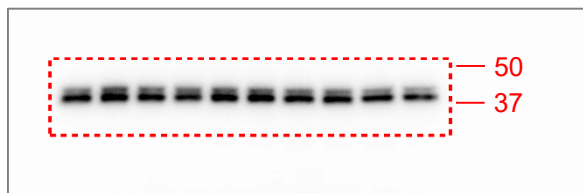

Chemiluminescence

STING\_SDS-PAGE with MW marker

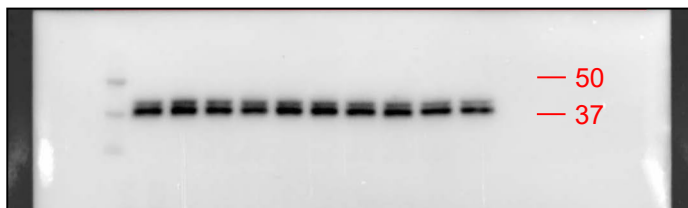

Merge: Chemiluminescence+Colorimetric

Tubulin\_loading control run  
on separated gel

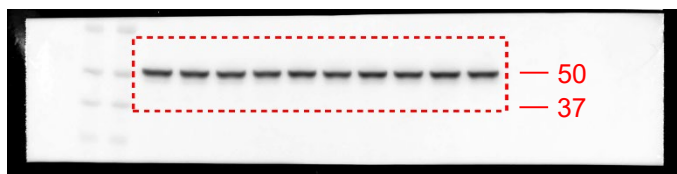

Colorimetric

Extended Figure 1a

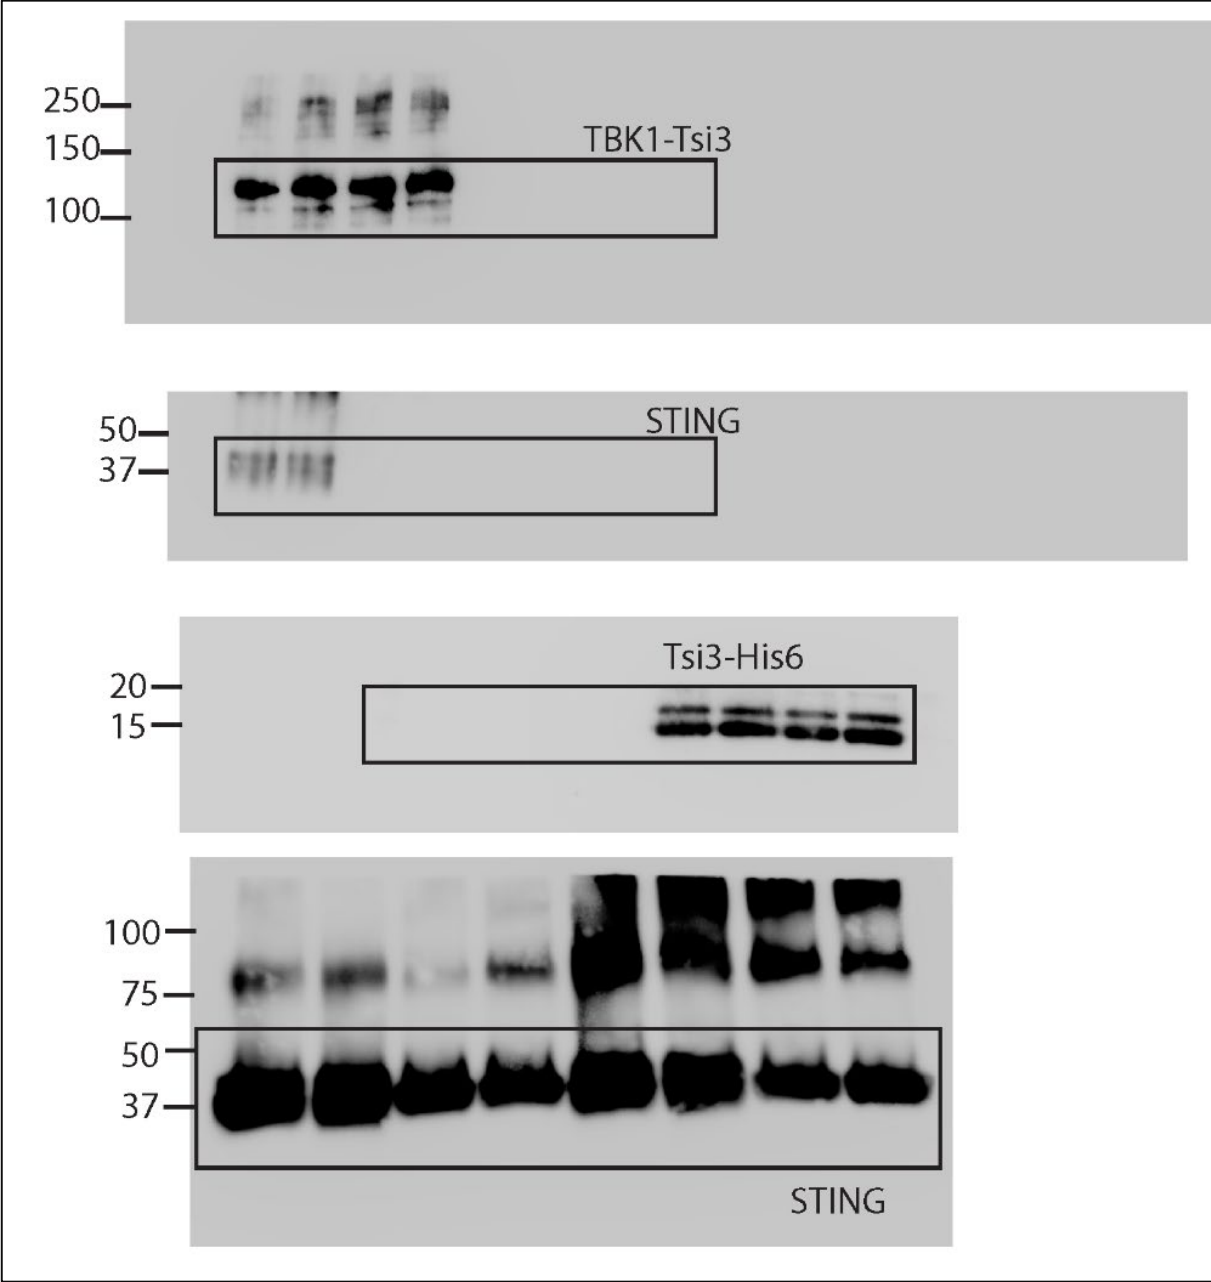

# Extended Figure 1b

## p-TBK1

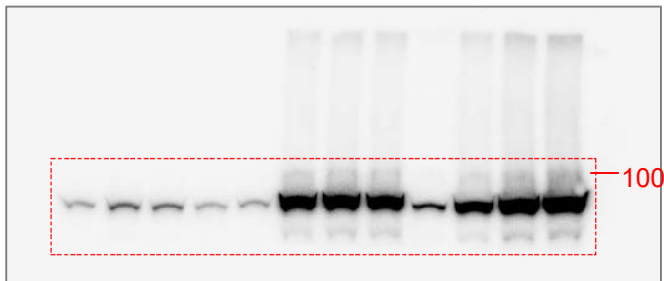

## p-TBK1 with MW marker

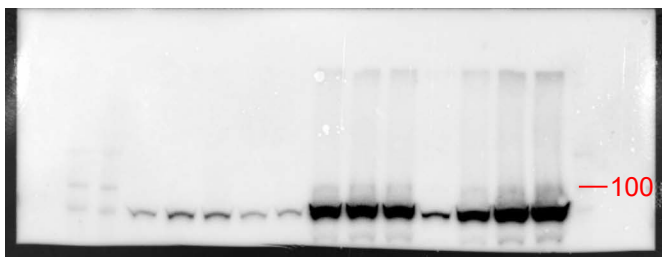

## FLAG

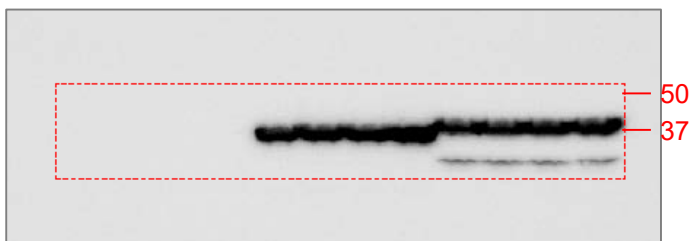

## FLAG with MW marker

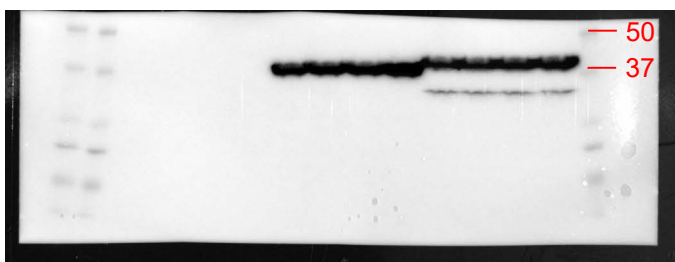

## GAPDH

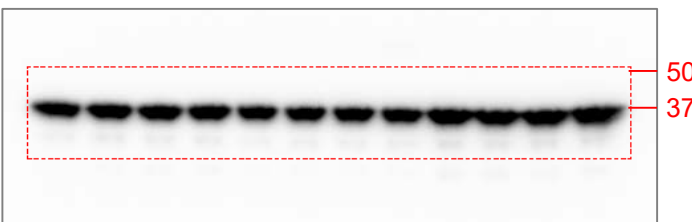

## GAPDH\_loading control run on separated gel

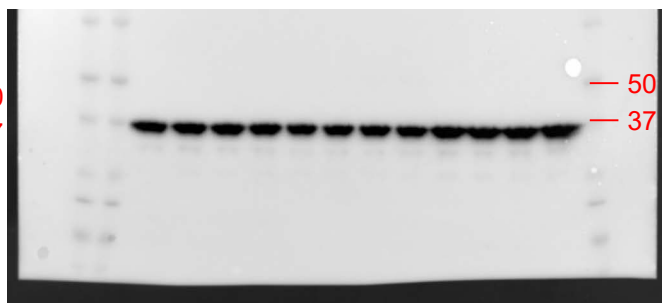

# Extended Figure 6

6a: p-TBK1

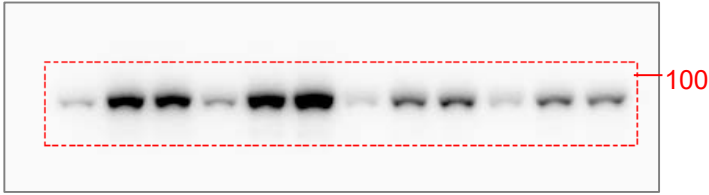

6a: p-TBK1 with MW marker

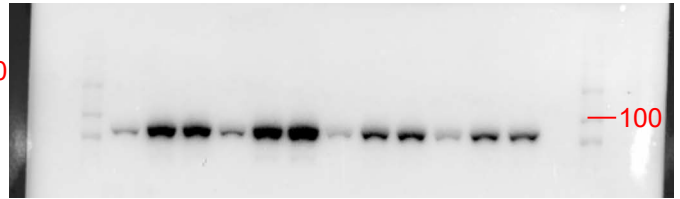

6a: p-STING

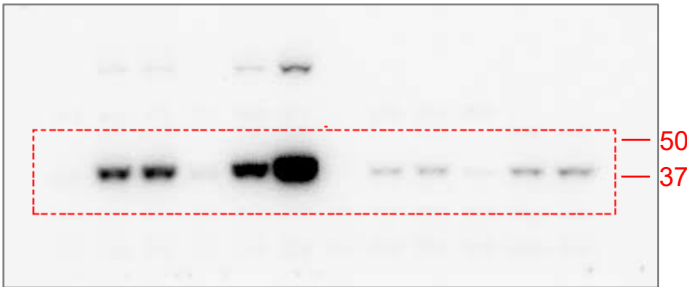

6a: p-STING with MW marker

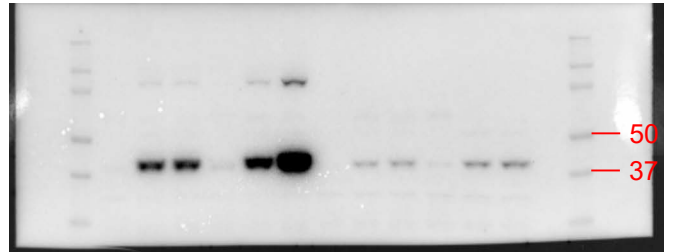

Chemiluminescence

Merge: Chemiluminescence+Colorimetric

6a: STING with MW marker

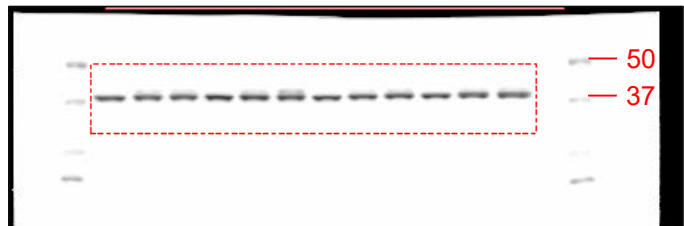

Colorimetric

# Extended Figure 6

6b: p-STING

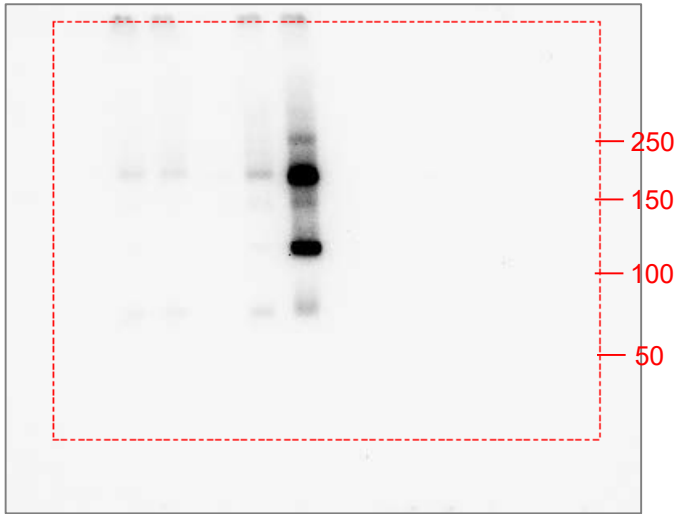

6b: p-STING with MW marker

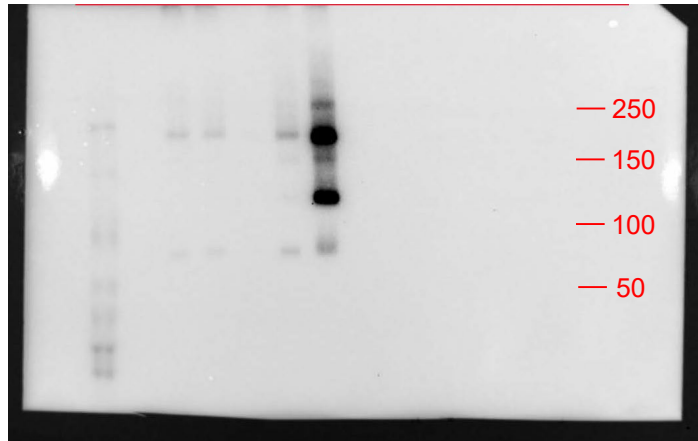

6c: STING

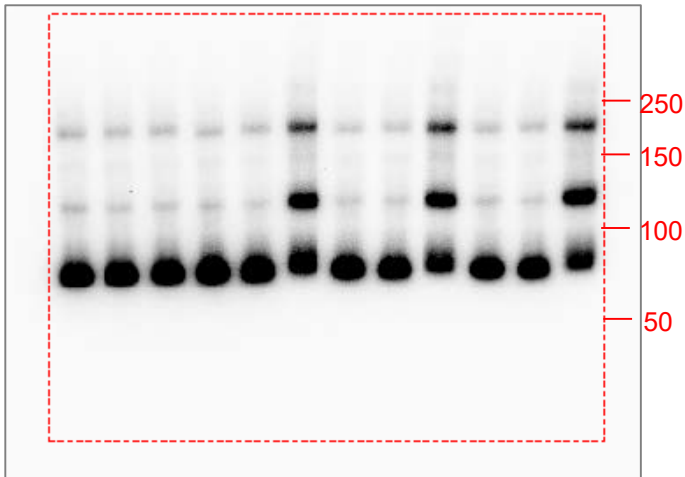

Chemiluminescence

6c: STING with MW marker

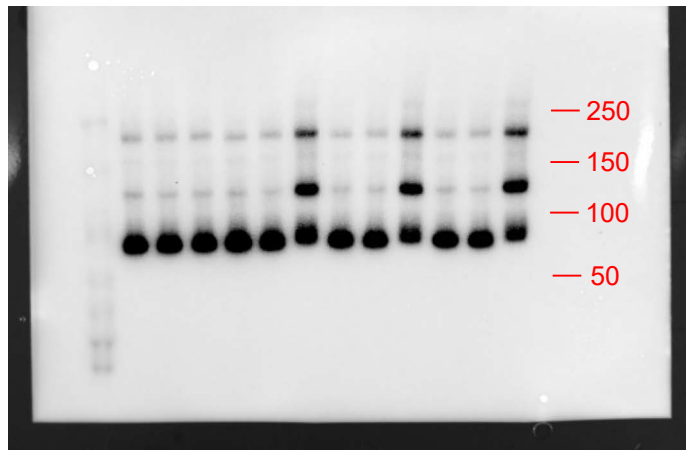

Merge: Chemiluminescence+Colorimetric



# Extended Figure 6

6d: p-TBK1

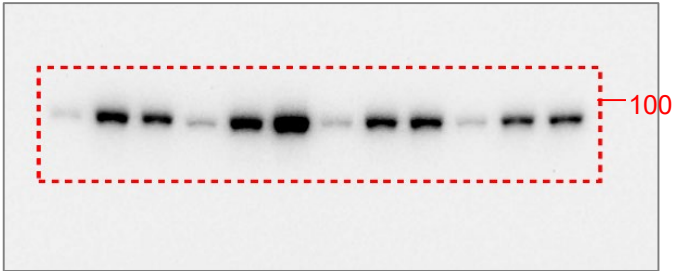

6d: p-TBK1 with MW marker

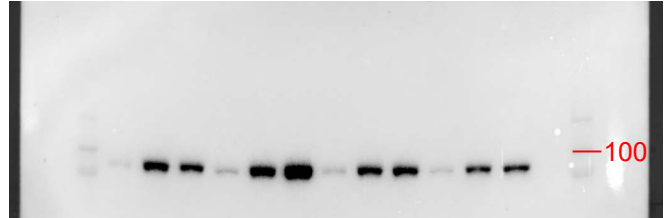

6d: p-STING

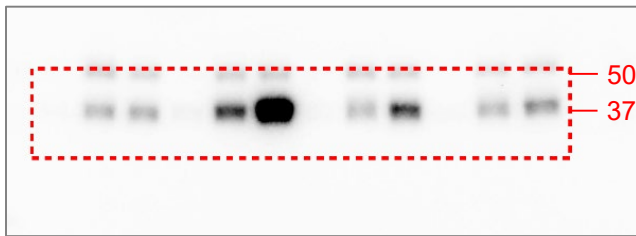

6d: p-STING with MW marker

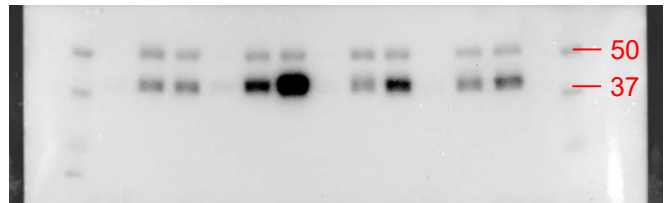

6d: STING

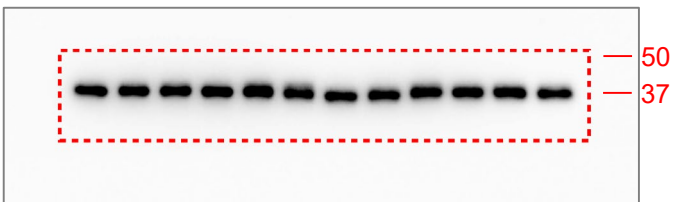

6d: STING with MW marker

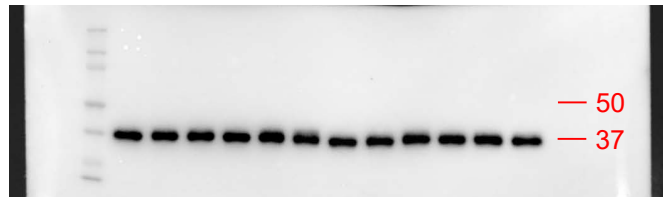

Chemiluminescence

Merge: Chemiluminescence+Colorimetric

# Extended Figure 6

6e: p-STING

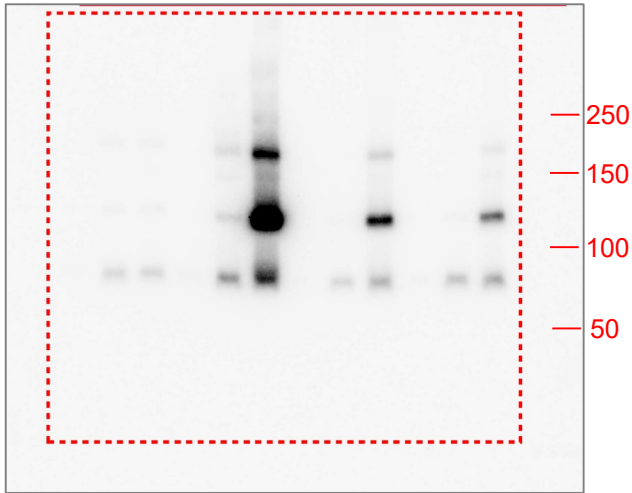

6e: p-STING with MW marker

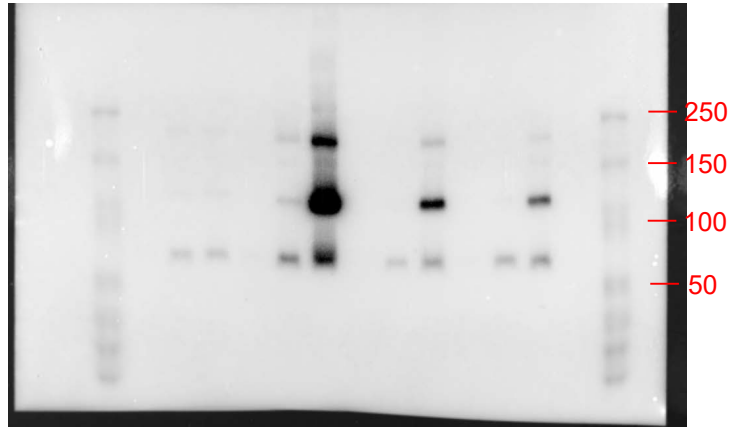

6f: STING

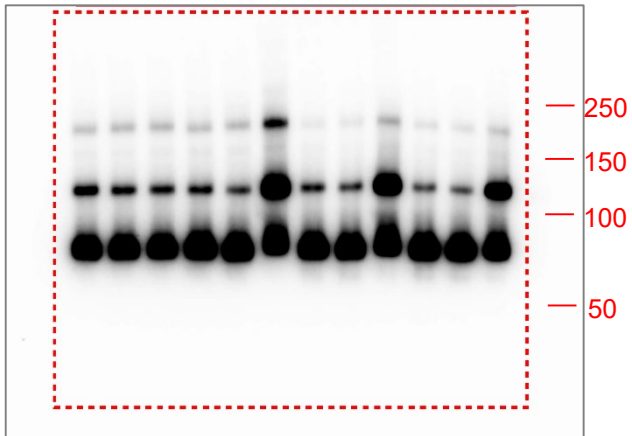

6f: STING with MW marker

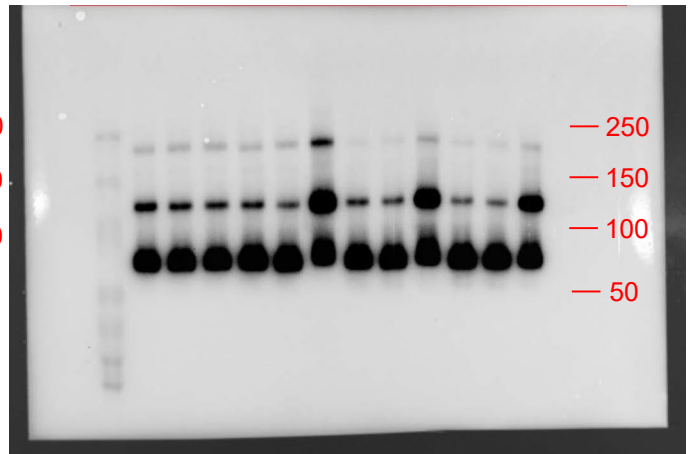

Chemiluminescence

Merge: Chemiluminescence+Colorimetric
